# Supplementary material
Source: publisher figshare collection journal article supplement (https://future-science-group.figshare.com/ndownloader/files/33620387)
Supplement: Supplementary file 1 [file 33620387]

**Supplementary Table 1:** SCCAg and sTIM-3 in the diagnosis of Stage I patients and Stage II patients

| Stage | Parameters | AUC | 95%CI | P value | Sensitivity | Specificity | Youden index |
| --- | --- | --- | --- | --- | --- | --- | --- |
| Stage I | SCCAg | 0.74 | 0.63-0.85 | 0.0001 | 54.3 | 96.3 | 50.5 |
| Stage II | SCCAg | 0.73 | 0.62-0.84 | 0.0001 | 48.5 | 94.4 | 42.9 |
| Stage I | sTIM-3 | 0.75 | 0.66-0.85 | 0.0001 | 80.0 | 70.1 | 50.1 |
| Stage II | sTIM-3 | 0.86 | 0.79-0.94 | 0.0001 | 81.8 | 85.0 | 66.9 |
| Stage I | SCCAg+sTIM-3 | 0.93 | 0.87-0.98 | 0.0001 | 85.7 | 87.9 | 73.6 |
| Stage II | SCCAg+sTIM-3 | 0.95 | 0.91-0.99 | 0.0001 | 84.8 | 93.5 | 78.3 |
